# 1 Hierarchical Spatial Search Strategies in *Drosophila*

2 Nicola Meda<sup>1</sup>, Giulio M. Menti<sup>1</sup>, Aram Megighian<sup>1,3,\*</sup>, Mauro A. Zordan<sup>2,3</sup>

3 <sup>1</sup>Department of Biomedical Sciences, University of Padova, via Ugo Bassi 58/B, 35131 Padova

4 <sup>2</sup>Department of Biology, University of Padova, via Ugo Bassi 58/B, 35131 Padova

5 <sup>3</sup>Padova Neuroscience Center, University of Padova, via Orus 2/B, 35131 Padova

6 \*Correspondence: [aram.megighian@unipd.it](mailto:aram.megighian@unipd.it)

7

8 Keywords: **Spatial Search; Visual Place Learning; Path Integration; Drosophila;**  
9 **Hierarchical Search Strategies; Decision-making;**

10

## 11 ABSTRACT

12 Animals rely on multiple sensory information systems to make decisions. The integration of  
13 information stemming from these systems is believed to result in a precise behavioural  
14 output. To what degree a single sensory system may override the others is unknown.  
15 Evidence for a hierarchical use of different systems to guide navigation is lacking. We  
16 used *Drosophila melanogaster* to investigate whether, in order to relieve an unpleasant  
17 stimulation, fruit flies employed an idiothetically-based local search strategy before making  
18 use of visual information, or viceversa. Fruit flies appear to initially resort to idiothetic  
19 information and only later, if the first strategy proves unsuccessful to relieve the  
20 unpleasant stimulation, make use of other information, such as visual cues. By leveraging  
21 on this innate preference for a hierarchical use of one strategy over another, we believe  
22 that *in vivo* recordings of brain activity during the navigation of fruit flies could provide  
23 mechanistic insights into how simultaneous information from multiple sensory modalities is  
24 evaluated, integrated, and motor responses elicited, thus shedding new light on the neural  
25 basis of decision-making.

## 26 **1. Introduction**

27 Animals make use of different information to explore their surroundings. Olfactory [1],  
28 visual [2–4] cues and self-centred (idiothetic) path integration [5–9] can be used to  
29 navigate an environment in search for food [10], relief [11] or for the purpose of mating  
30 [12,13]. The reductionist approach to behavioural neuroscience has so far provided  
31 mechanistic insights into how each sensory modality drives specific behaviours [14], but  
32 the knowledge of the relationships between different sensory information systems, and  
33 how animals use these to reach their goals is just at its beginning [15–17]. To the best of  
34 our knowledge, there is no evidence for a hierarchical use of different information systems  
35 to guide navigation in simple animal models [18]. Invertebrates, particularly insects, are  
36 excellent models to study how a less complex brain produces behaviours [19,20]. Insects  
37 can be trained to pinpoint a location in space where an unpleasant stimulation ceases,  
38 where food may be present, or where a pleasant sensation may be experienced [2,21–23].  
39 Insects explore their environment while relying on multiple sources of information, of which  
40 the most studied are visual cues and path integration. Visual stimuli can be associated  
41 with a stimulus of relevance to the animal, and having a positive valence, such as the  
42 obtainment of food, the relief from a negative stimulus or the possibility of mating. Path  
43 integration is the behavioural output of an “internal pacemaker”, the activity of which  
44 guides the locomotion of the animal in order to maximize its chance of reaching a relevant  
45 stimulus previously encountered while navigating. We used *Drosophila melanogaster* to  
46 investigate whether we could find evidence for the hierarchical use of different sources of  
47 information; specifically, we asked the question whether, in order to relieve an unpleasant  
48 stimulation, fruit flies employed an idiothetically-based local search strategy before making  
49 use of visual information, or viceversa.

## 51 **2. Materials and Methods**

52 We obtained the experimental progeny, characterised by the expression of a red-shifted  
53 rhodopsin in bitter-sensing neurons, from crossing Blooming Stock Center (BSC) line  
54 57670 (in which expression of Gal4 was restricted to bitter-sensing neurons), to BSC line  
55 55135, a UAS-CsChrimson construct-bearing line. Thus, these transgenic flies are  
56 characterised by having bitter-sensing neurons that can be stimulated via brief red-light  
57 pulses [24,25]. For our behavioural experiments we opted to use only 6 to 10-day-old adult  
58 male flies. A single fly was loaded into a circular arena of 109mm diameter, in which the  
59 insect was free to walk, but not fly. The arena was loaded on a raised platform, which was  
60 illuminated from below by an infrared-emitting lamp. Optogenetic stimulation was delivered  
61 with a pair of 3 red-light (627nm) emitting LEDs placed on opposing sides of the arena and  
62 30 cm above it. A cylinder composed of 48 panels, each consisting of an 8x8 grid of green  
63 (520nm) LEDs, was lowered around the arena. The LEDs were programmed to display  
64 two diametrically opposed black stripes, one vertical and the other horizontal, each  
65 spanning an equal area on an evenly green lit background. The vertical stripe was  
66 spatially-matched to a 6cm<sup>2</sup> "safe zone" (i.e. a zone where no optogenetic stimulation  
67 occurred). In order to trigger/shut off optogenetic stimulation according to the spatial  
68 location of the fly, we recorded fly movements inside the arena with a Chameleon 3 (FLIR,  
69 USA) camera equipped with an IR bandpass filter and live-tracked fly locomotion at 11  
70 frames-per-second with a customised version of the Motion-Based Multiple Object  
71 Tracking script by MathWorks®. Real-time fly coordinates were used by the script to drive  
72 a Genuino board's output signals (and consequently the optogenetic stimulation) as  
73 follows: whenever the xy coordinates of the centroid representing the fly were within a  
74 "safe zone" in the arena, the optogenetic stimulus was turned off; as soon as the fly left the  
75 safe zone, the stimulus was turned on and the fly bitter-sensing neurons were stimulated.  
76 Behavioural experiments consisted of two parts, a training session and a probe session.

77 Each training session was made up of 16 trials. We did not consider the first trial in our  
78 analysis, given that flies had not yet had any experience of a safe spatial location. During  
79 the first 30 seconds of each trial the fly was free to explore the arena in complete  
80 darkness; for the next 30 seconds the fly could explore the arena in the presence of the  
81 green LED visual patterns. During the last 2 minutes of each trial, the fly could be  
82 subjected to optogenetic stimulation according to its position in the arena, still in the  
83 presence of the green LED visual patterns. On alternate trials, the whole green LED  
84 panorama was rotated by 180°: during odd numbered trials (1st, 3rd, ..., 15th) the safe  
85 zone was adjacent to the 'southern end' of the arena and matched to the vertical stripe;  
86 during even numbered trials, the safe zone was adjacent to the 'northern end' of the arena  
87 and matched to the vertical stripe (figure 1A). If not otherwise specified, data from the  
88 analysis that follow were obtained from 140 experiments (flies N = 140). We analysed our  
89 data with a regression model selection-based approach. Full details on methods and  
90 statistical analyses are presented in electronic supplementary materials, methods S1 [26–  
91 33]. The procedures described herein had also been implemented in [34]. Detailed  
92 characteristics of each regression model can be found in electronic supplementary  
93 material, table S1.

94

### 95 **3. Results and Discussion**

96 It has been extensively shown that *Drosophila melanogaster* can be trained to distinguish  
97 identical objects with different orientations [35–37]. We therefore trained flies to  
98 differentiate between a vertical black stripe, linked to relief from optogenetically-induced  
99 bitter taste, from a diametrically-opposed horizontal one (figure 1B-D, electronic  
100 supplementary material, figure S1). At the beginning of each new trial, the vertical stripe –  
101 safe zone match and the horizontal stripe positions were switched. In this way, at the start  
102 of each new trial and at the first onset of optogenetic stimulation, fruit flies could potentially

103 experience two conflicting sources of information as to where relief could take place: either  
104 in the spatial location where flies previously (in the preceding trial) experienced relief  
105 (PreviousSafeZone – currently matched to the horizontal stripe) or in the current location  
106 of the vertical stripe (SafeZone). In this ambiguous situation, the animal is faced with the  
107 possibility of using a search strategy based either on local path integration or on visual  
108 information. To start with, we focused our attention on the behaviour of flies at the start of  
109 each new trial, 30” before the first onset of optogenetic stimulation and 30” after its onset.  
110 This 60-second period (from frame 330 to frame 990) was further divided into 6, 10-second  
111 sub-periods. As expected, this analysis revealed that in each new trial, before the onset of  
112 the first optogenetic stimulation, fruit flies were more numerous in the region where the  
113 previous safe zone was located than in the region where the current safe zone was  
114 located (figure 2A). As soon as the optogenetic stimulation started, fruit flies left the  
115 previous safe zone and began searching for relief on the opposite side of the arena (in the  
116 location corresponding to the current vertical stripe – safe zone match). As a  
117 consequence, following the onset of optogenetic stimulation, flies began to spend more  
118 time in the safe zone and less in the previous safe zone (figure 2B). This feature can also  
119 be seen in the density plots in figure 2D and 2E, as a reduction in the density of residency  
120 in the previous safe zone in favour of the current safe zone (demarcated by the square).  
121 One might expect that, following the onset of optogenetic stimulation, there should be an  
122 increase in the searching behaviour of the fruit flies in the vicinity of the current safe zone.  
123 Nonetheless, we show that throughout the whole training session, at the start of each new  
124 trial, at the first onset of the negative stimulation, fruit flies showed an equally elevated  
125 frequency of entries into either the previous safe zone or into the current safe zone (figure  
126 2C), suggesting that some flies searched for relief in the previous safe zone. Furthermore,  
127 this behaviour does not appear to be affected by learning: in fact, training progression  
128 influenced neither the number of flies in both zones nor the number of visits to both zones

129 between frames 330-990 (i.e. training progression is not a significant predictor of the  
130 aforementioned variables, electronic supplementary material, table S1). In order to identify  
131 the group of flies that, at the onset of the optogenetic stimulus entered the previous safe  
132 zone, we subset all the 140 flies object of our study into three subgroups: 1. flies which  
133 were inside the previous safe zone at the beginning of the stimulation (at frame 661); 2.  
134 flies that, in that same moment were inside the current safe zone; 3. flies that were in  
135 neither of the preceding zones. Since flies which were already inside the current safe zone  
136 at the onset of the optogenetic stimulation would not have experienced virtual bitter taste,  
137 we discarded this group of flies from this analysis, and considered only the two remaining  
138 groups. In figure 3A we show that the mean number of flies that were already inside the  
139 previous zone (blue pointrange) at frame 661 did not change in the 10 seconds after the  
140 onset of stimulation; on the other hand, flies that were outside the previous safe zone  
141 (orange pointrange) proceeded to enter the previous safe zone after the onset of  
142 stimulation, thus increasing the overall number of flies therein. This sudden entrance of  
143 flies from outside the previous safe zone is also seen in figure 3C, where an increase in  
144 the number of visits of this group of flies to the previous safe zone is evidenced. However,  
145 following the onset of optogenetic stimulation both groups of flies spend less time in the  
146 previous safe zone: this is because notwithstanding the increase in the number of visits to  
147 the previous zone, such visits are of short duration (since no relief is provided), suggesting  
148 that flies “attempt” to obtain relief from the bitter taste stimulation by entering the previous  
149 safe zone but, since this does not provide any relief, they quickly move away from that  
150 location. The density plots in figure 3D-F show the change in residency density for each of  
151 the two groups of flies separately, and for both groups considered together, respectively.  
152 As evidenced by the data plotted in Figure 3, the group of flies that were outside of both  
153 zones at the onset of the optogenetic stimulation were responsible for the increase in the  
154 number of visits and in the mean number of flies in that same zone. However, as may be

155 noticed in figure 3E, some of the fruit flies in this group entered the current safe zone, as  
156 evidenced by the increased residence density in the plots of the 10 seconds after the  
157 onset of the stimulation. We therefore investigated how many of the flies which were  
158 previously outside both zones then entered the safe zone or the previous safe zone. We  
159 found that flies belonging to this group increased their number of visits in the same  
160 measure to both zones (previous safe zone and safe zone) in the 10 seconds immediately  
161 following the start of stimulation (figure 4B), and this is reflected also on the mean number  
162 of flies that can be found in both zones during this period (figure 4A). The previous safe  
163 zone and the (current) safe zone were visited in the same measure by the same number of  
164 flies, suggesting that flies did not take into consideration which visual marker they were  
165 approaching. Given that this behavioural choice (choosing which zone to explore first)  
166 does not appear to depend upon learning (i.e. training progression, also for this subgroup  
167 of flies, does not influence the number of flies/number of visits to both zones, electronic  
168 supplementary material, table S1) and that fruit flies can differentiate between a vertical  
169 and a horizontal bar (electronic supplementary material, figure S1) [35–37], we wished to  
170 ascertain whether fruit flies entered preferentially into one of the two zones based on their  
171 spatial location in the arena (i.e. proximity to one of the two zones). Thus, we divided the  
172 group of flies outside of both zones at frame 661 according to which was the first zone  
173 entered. Figure 5A and 5C show the positions of the flies that entered the previous safe  
174 zone (marked by the horizontal bar) or the current safe zone respectively, during the trials  
175 in which the safe zone was located at the northern-end of the arena (marked by the  
176 vertical bar); whereas, Figure 5F and 5H, show the same information relative to the trials in  
177 which the safe zone was located at the southern-end of the arena. These density plots  
178 suggest that flies tend to enter the zone which was closest to them at the onset of the  
179 optogenetic stimulation. We thus tested whether the spatial distribution of each group of  
180 flies, for each set of trials (i.e. subdivided according to whether the safe zone was at the

181 northern end of the arena or at the southern end) was more aggregated than the  
182 distribution expected under the hypotheses of a random distribution. To do this, we applied  
183 Marcon and Peuch's M function [29–31] and tested if the observed spatial distribution of  
184 flies presented evidence of a greater aggregation than the random expectation  
185 represented by 10.000 simulated random distributions. For both sets of trials (i.e.  
186 north/south according to where the safe zone was located), and for both groups (i.e. which  
187 zone was entered first), flies showed evidence for significantly greater aggregation than  
188 expected under the null hypothesis of random distribution (figure 5B and 5D and 5G and  
189 5I). Moreover, if at the time of onset of the optogenetic stimulation, the position of a fly in  
190 the arena may be considered a predictor of which will be the first zone to be visited, the  
191 positions of the flies which are predicted to enter the previous safe zone should not show  
192 any overlap with the positions of the flies which are predicted to enter the current safe  
193 zone (i.e. the two groups should be spatially segregated). We found that the two groups of  
194 flies show significant segregation in both sets of trials (figure 5E and 5L). We also  
195 conducted a further set of experiments, with 40 more flies, in which the visual environment  
196 presented two identical and diametrically opposed vertical stripes, with only one of them  
197 matched to a safe zone. With this set of experiments we reproduced the results previously  
198 described herein, suggesting that the initial search strategy employed by the flies object of  
199 the present work appears to be independent of visual cues (electronic supplementary  
200 material, figure S2 and S3), is not a consequence of learning and shows evidence of being  
201 guided by the spatial location of the fly at the onset of the negative stimulation much in the  
202 same way as occurs in the case of an idiotetically-based local search strategy (path  
203 integration) [6,8,38]. In fact, at the beginning of a new trial, before the optogenetic  
204 stimulation begins, the fruit flies are free to explore the environment without being  
205 punished: as flies experience the first instance of bitter-taste (at frame 661), the closest  
206 spatial location that yielded no punishment is in the vicinity of the fly itself (namely, where



207 the fly was at frame 660). Thus, it is straightforward for an animal to search for relief in the  
208 vicinity of its current position.

209

#### 210 **4. Conclusions**

211 With the paradigm employed in these experiments and the large sample of flies tested, we  
212 provide evidence for a consistent hierarchical use of information during spatial navigation  
213 in *D. melanogaster*. Our experiments show that fruit flies, when forced to choose between  
214 relying on self-centred or visual cues to guide their local search, appear to initially resort to  
215 idiothetic information and only later, if the first strategy proves unsuccessful, make use of  
216 other information, such as visual cues. The reasons for such a consistent hierarchical use  
217 of one informational system over another are at present unknown, but we advance the  
218 hypothesis that employing path integration as the first spatial search strategy possibly  
219 requires less computation, thus yielding faster behavioural responses, than the evaluation  
220 and sensory integration of external (i.e. visual) information. By leveraging on this innate  
221 preference of a hierarchical use of one strategy over another, *in vivo* recordings of brain  
222 activity during the navigation of fruit flies could provide mechanistic insights into how  
223 simultaneous information from multiple sensory modalities is evaluated, integrated and  
224 motor responses elicited, thus shedding new light on the neural basis of decision-making.

225

#### 226 **Figure captions**

##### 227 **Figure 1. Paradigm and fruit flies training**

228 A) brief summary of the behavioural paradigm and experimental question; B) time spent  
229 (s) in the safe zone, marked by the vertical stripe, compared to the time spent in the non-  
230 safe zone (marked by the horizontal stripe) during 16 trials of training. Flies spent

231 significantly more time in the safe zone during the time when optogenetic stimulation may  
232 occur than in a homologous zone where no relief is provided (number of observations =  
233 280, linear mixed-effects (lme) model with zone as explanatory variable compared to the  
234 null model  $\chi^2 = 309.67$ ,  $df = 1$ ,  $p = 0.000$ ,  $\Delta AIC = 307.6$ ,  $\Delta BIC = 304$ ); C) Velocity profile of  
235 fruit flies after entering a zone where relief is provided (yellow line) compared to the profile  
236 (grey line) after entering the non-safe zone (number of observed velocities = 624637, lme  
237 model with interaction between frame after entrance into one of the zones and specific  
238 zone as explanatory variable compared to a model with only frame after entrance as  
239 explanatory variable,  $\chi^2 = 16688$ ,  $df = 1$ ,  $p = 0.000$ ,  $\Delta AIC > 10^4$ ,  $\Delta BIC > 10^4$ ); D) density  
240 plots describing the residency of flies during training session, while optogenetic stimulation  
241 is triggered if flies leave the safe zone (squared). The plot on the left describes the  
242 residency of flies when the safe zone is at the southern end (during odd numbered trials)  
243 of the arena, the right one when the safe zone is at the northern-end.

244

245 **Figure 2. Distribution of flies in the two zones before and after the onset of**  
246 **optogenetic stimulation.**

247 We subdivided the 660 frames (60 seconds) time window considered into 6 identical  
248 periods of 10 seconds each (from frame 330 to frame 440, from 440 to 550 etc.). The  
249 green bar represents the 30 seconds of visual pattern display, without optogenetic  
250 stimulation, the red bar marks the half-minute during which optogenetic is triggered  
251 according to fly position in the arena. For each 10 second period we computed the mean  
252 of the observed values of the y-variables later explained. Pointrange represents the mean  
253 and the confidence interval around the mean. A) Mean number of flies for each period  
254 considered, divided according to the zone considered. The number of fruit flies in the  
255 previous safe zone (matched to the horizontal stripe) decreases after the onset of

256 optogenetic stimulation in favour of an increase in the number of flies in the current safe  
257 zone (matched to the vertical stripe). The mean number of fruit flies inside each zone  
258 depends on the zone itself (whether it is providing relief or not) and its interaction with the  
259 period of time considered (number of observations = 179, generalised linear mixed-model  
260 (glmm) with zone and period interaction as explanatory variable compared to only zone  
261 model  $\chi^2 = 83.47$ ,  $df = 1$ ,  $p = 0.000$ ,  $\Delta AIC = 81.5$ ,  $\Delta BIC = 78.3$ ). This result is independent  
262 from the trial in which flies are counted (the best glmm is a null model), suggesting there is  
263 no change as the training progresses; B) The time fruit flies spend in the zones depends  
264 on the zone considered and its interaction with the progression of time (number of  
265 observations = 3527, lme with zone and period interaction as explanatory variables when  
266 compared to a model with only zone as the explanatory variable  $\chi^2 = 174.88$ ,  $df = 1$ ,  $p =$   
267  $.000$ ,  $\Delta AIC = 173$ ,  $\Delta BIC = 167$ ). In this case a significant role is played by the progression  
268 of training, since flies, as expected, improve their learning (number of observations =  
269 3527, lme with interaction between zone and trial as explanatory variables, when  
270 compared to a model with only zone as the explanatory variable  $\chi^2 = 10.14$ ,  $df = 1$ ,  $p =$   
271  $0.001$ ,  $\Delta AIC = 9$ ,  $\Delta BIC = 2$ ); C) Mean number of visits to the two zones throughout the  
272 whole training period is a function of the interaction between each zone and the period of  
273 time considered (number of observations = 1504, generalised linear mixed-model (glmm)  
274 with zone and period interaction as explanatory variable compared to a model with only  
275 zone as explanatory  $\chi^2 = 67.66$ ,  $df = 1$ ,  $p = 0.000$ ,  $\Delta AIC = 65.6$ ,  $\Delta BIC = 60.4$ ). Zone alone  
276 is not a good predictor of the number of visits, suggesting that there is no difference  
277 between the number of visits to the two zones, suggesting that flies search within both  
278 zones in the same measure during the time period considered (when a model with zone as  
279 the explanatory variable is compared to a null model, there's no significant difference  
280 between the two models, number of observations = 1504,  $\chi^2 = 0.001$ ,  $df = 1$ ,  $p = 0.96$ ); D)  
281 Density plots of the spatial distributions of flies before the onset of optogenetic stimulation

282 (higher row) and during the stimulation (lower row) when the safe zone is located at the  
283 northern-end of the arena. Fruit flies are aggregated within the previous safe zone in the  
284 first 10 seconds after the visual stimuli are displayed (440, representing the period of time  
285 from frame 330 to frame 440), in the following two periods they begin to scatter throughout  
286 the whole arena, and since optogenetic stimulation is delivered according to the position of  
287 the flies (770), flies start to aggregate in the safe zone. E) As in D), but when the safe zone  
288 is located at the southern-end of the arena.

289

290 **Figure 3. Some flies return to the previous safe zone at the onset of optogenetic**  
291 **stimulation**

292 Subsetting of periods was performed as described in the caption to Figure 2. Pointrange  
293 represents the mean and the confidence interval around the mean. We subdivided the flies  
294 into two groups: one consisting in flies which at frame 661 (when the optogenetic  
295 stimulation starts) which are already inside the previous safe zone and another consisting  
296 in flies which are outside both the previous safe zone and the current safe zone. A) The  
297 mean number of flies that are already inside the previous safe zone (blue point range) at  
298 the onset of the stimulation remains stable during the first 10 seconds of stimulation; Some  
299 of the flies that were outside both zones at frame 661 (orange point range) return to the  
300 previous safe zone (number of observations = 180, generalised linear mixed-model (glmm)  
301 with the interaction of fly group and period as the explanatory variables compared to a  
302 model with only fly group as the predictor  $\chi^2 = 39.43$ ,  $df = 1$ ,  $p < 0.001$ ,  $\Delta AIC = 37.5$ ,  $\Delta BIC$   
303  $= 34.3$ ). This result is independent from the trial in which flies are counted (the best glmm  
304 is a null model), suggesting there is no change as the training progresses (i.e.  
305 independence from learning). A model with only group as the explanatory variable is better  
306 than a null model (electronic supplementary material, table S1), suggesting there is also a  
307 difference between the two groups of flies independently from the period of time B) The

308 time fruit flies spend in the previous safe zone depends on the zone considered and its  
309 interaction with the progression of time (number of observations = 4232, lme with  
310 interaction between group and time as explanatory variables when compared to a model  
311 with only zone as the explanatory variable  $\chi^2 = 220.19$ ,  $df = 1$ ,  $p = 0.000$ ,  $\Delta AIC = 218$ ,  
312  $\Delta BIC = 212$ ). In this case the progression of training is not significant, suggesting that this  
313 effect is not affected by learning. C) Mean number of visits to the previous safe zone  
314 throughout the whole training session is a function of the interaction between each group  
315 of flies and the period of time considered, with no effect due to the progression of training  
316 (number of observations = 1082, generalised linear mixed-model (glmm) with the  
317 interaction between group and period as explanatory variables compared to a model with  
318 only group as the explanatory variable ( $\chi^2 = 10.3$ ,  $df = 1$ ,  $p = 0.001$ ,  $\Delta AIC = 8.3$ ,  $\Delta BIC =$   
319  $3.3$ ); D) Density plots of flies already inside the previous safe zone in the 10-second-period  
320 before the onset of stimulation (660) and in the following 10 seconds (770), when the safe  
321 zone is at the northern-end (left) or at southern-end (right). In both cases the flies quickly  
322 spread away from the previous safe zone; E) As in D), but in this case the group of flies  
323 which are outside the previous safe zone at frame 661 are represented; F) superimposition  
324 of the density plots shown in D) and E)

325

326 **Figure 4. Fruit flies which are initially outside the two zones, equally distribute to**  
327 **either of the two zones soon after optogenetic stimulus onset**

328 Subdivision of periods as described in the caption to figure 2. Pointrange represents the  
329 mean and the confidence interval around the mean. A) Mean number of fruit flies, which  
330 are initially outside both zones and that at the onset of optogenetic stimulation (at frame  
331 661), then populate the two zones. In the 10-second-period after the onset of optogenetic  
332 stimulation (770), an approximately equal number of flies enters into either the previous  
333 safe zone or the current safe zone. Thus the difference between the number of flies that

334 approach either one of the two zones is not significant (number of observations = 180,  
335 generalised linear mixed-model (glmm) with zone and period interaction as explanatory  
336 variable compared to a model with only zone as the predictor  $\chi^2 = 205.43$ ,  $df = 1$ ,  $p =$   
337  $0.000$ ,  $\Delta AIC = 203.4$ ,  $\Delta BIC = 200.2$ ); B) Mean number of visits to the zones throughout the  
338 whole training session is a function of the interaction between zone and the period of time  
339 considered, with no effect due to the progression of training (number of observations =  
340 1392, generalised linear mixed-model (glmm) with the interaction between zone and  
341 period as the explanatory variables compared to a model with only group as the predictor  
342 ( $\chi^2 = 67.88$ ,  $df = 1$ ,  $p = 0.000$ ,  $\Delta AIC = 65.9$ ,  $\Delta BIC = 60.7$ ). Zone alone is not a good  
343 predictor of the number of visits, suggesting that there is no difference between the  
344 number of visits to the two zones, suggesting that flies search both zones in the same  
345 measure (when a model with zone as the explanatory variable is compared to a null  
346 model, there's no significant difference between the two models; number of observations =  
347 1392,  $\chi^2 = 1.26$ ,  $df = 1$ ,  $p = 0.26$ ).

348

#### 349 **Figure 5. Spatial dependence of the choice of the first zone**

350 A) Spatial distribution at frame 661 (when the first pulse of optogenetic stimulation is  
351 delivered) of fruit flies which will then approach the horizontal stripe, thus entering the  
352 previous safe zone first, during trials in which this is found at the southern-end of the  
353 arena; B) Marcon and Peuch M's function value represents the number of observed flies at  
354 each distance from a single fly (radius) compared to the expected values from a random  
355 distribution (red dashed line, grey shading represent the envelope built on 10.000  
356 simulations of random distributions). A value greater than 1 suggests aggregation. A  
357 goodness-of-fit test of the observed data reveals that flies are significantly more  
358 aggregated than expected (number of observations = 277,  $p = 0.000$ ); C) Spatial  
359 distribution at frame 661 of fruit flies which will approach the vertical stripe, thus entering

360 the safe zone first; D) M function value is significantly greater than expected under the null  
361 hypothesis (number of observations = 256,  $p = 0.000$ ) suggesting spatial aggregation of  
362 flies; E) M function value assessing whether the two distributions of flies reported in A) and  
363 C) actually consist of two distinct aggregates. An M function value  $< 1$  suggests that  
364 spatial repulsion between the two groups of flies (number of observations = 533,  $p =$   
365  $0.000$ ), indicating that flies which will enter the current safe zone are spatially segregated  
366 from flies which will enter the previous safe zone; F) Spatial distribution of fruit flies at  
367 frame 661 which will approach the horizontal stripe, thus entering the previous safe zone  
368 first, located at the northern-end of the arena. G) Goodness-of-fit of observed data  
369 suggests that flies are more spatially aggregated than expected, as seen in B) (number of  
370 observations = 229,  $p = 0.000$ ); H) Spatial distribution of fruit flies at frame 661 which will  
371 approach the vertical stripe, thus entering the safe zone first; I) Goodness-of-fit of  
372 observed data suggests that flies are more spatially aggregated than expected (number of  
373 observations = 209,  $p = 0.000$ ); L) M function value assessing whether the two  
374 distributions of flies reported in F) and H) actually represent two distinct aggregates. A  
375 goodness-of-fit test suggests spatial repulsion between the two groups of flies (number of  
376 observations = 438,  $p = 0.000$ ), indicating that flies which will enter the safe zone are  
377 spatially segregated from flies which will enter the previous safe zone, thus supporting the  
378 hypotheses that spatial location is a predictor of which zone is explored first;

379

380 **CRedit authorship contribution statement Nicola Meda** Conceptualization,  
381 Methodology, Data acquisition, Formal analysis, Visualization, Data curation, Writing -  
382 original draft, Writing - review & editing. **Giulio M. Menti** Methodology, Data acquisition,  
383 Writing - review & editing **Aram Megighian** Conceptualization, Methodology, Writing -  
384 review & editing **Mauro A. Zordan** Conceptualization, Methodology, Software, Writing -  
385 review & editing

386

387 **Competing interests** the authors declare no conflict of interests

388

389 **Funding** This work was supported by A.M. and M.A.Z. DOR Funds

390

391 **Acknowledgements** the authors thank Dr. Paola Cisotto for technical support, Dr.

392 Giovanni Frighetto for experimental set-up preparation, Prof. Marco Dal Maschio and Dr.

393 Irene Slongo for helpful suggestions.

394

## 395 **References**

396 1. Webb B, Wystrach A. 2016 Neural mechanisms of insect navigation. *Current Opinion*

397 *in Insect Science* **15**, 27–39. (doi:10.1016/j.cois.2016.02.011)

398 2. Ofstad TA, Zuker CS, Reiser MB. 2011 Visual place learning in *Drosophila*

399 *melanogaster*. *Nature* **474**, 204–207. (doi:10.1038/nature10131)

400 3. Morris R. 1984 Developments of a water-maze procedure for studying spatial learning

401 in the rat. *Journal of Neuroscience Methods* **11**, 47–60. (doi:10.1016/0165-

402 0270(84)90007-4)

403 4. Foucaud J, Burns JG, Mery F. 2010 Use of Spatial Information and Search Strategies

404 in a Water Maze Analog in *Drosophila melanogaster*. *PLoS ONE* **5**, e15231.

405 (doi:10.1371/journal.pone.0015231)

406 5. Collett M, Collett TS. 2000 How do insects use path integration for their navigation?

407 *Biol Cybern* **83**, 245–259. (doi:10.1007/s004220000168)

408 6. Kim IS, Dickinson MH. 2017 Idiothetic Path Integration in the Fruit Fly *Drosophila*

409 *melanogaster*. *Current Biology* **27**, 2227–2238.e3. (doi:10.1016/j.cub.2017.06.026)



- 410 7. Seelig JD, Jayaraman V. 2015 Neural dynamics for landmark orientation and angular  
411 path integration. *Nature* **521**, 186–191. (doi:10.1038/nature14446)
- 412 8. Heinze S, Narendra A, Cheung A. 2018 Principles of Insect Path Integration. *Current*  
413 *Biology* **28**, R1043–R1058. (doi:10.1016/j.cub.2018.04.058)
- 414 9. Collett TS. 2019 Path integration: how details of the honeybee waggle dance and the  
415 foraging strategies of desert ants might help in understanding its mechanisms. *J Exp*  
416 *Biol* **222**, jeb205187. (doi:10.1242/jeb.205187)
- 417 10. Corfas RA, Sharma T, Dickinson MH. 2019 Diverse Food-Sensing Neurons Trigger  
418 Idiothetic Local Search in *Drosophila*. *Current Biology* **29**, 1660-1668.e4.  
419 (doi:10.1016/j.cub.2019.03.004)
- 420 11. Yarali A, Niewalda T, Chen Y, Tanimoto H, Duerrnagel S, Gerber B. 2008 ‘Pain relief’  
421 learning in fruit flies. *Animal Behaviour* **76**, 1173–1185.  
422 (doi:10.1016/j.anbehav.2008.05.025)
- 423 12. Billeter J-C, Jagadeesh S, Stepek N, Azanchi R, Levine JD. 2012 *Drosophila*  
424 melanogaster females change mating behaviour and offspring production based on  
425 social context. *Proc Biol Sci* **279**, 2417–2425. (doi:10.1098/rspb.2011.2676)
- 426 13. Hussain A, Üçpınar HK, Zhang M, Loschek LF, Grunwald Kadow IC. 2016  
427 Neuropeptides Modulate Female Chemosensory Processing upon Mating in  
428 *Drosophila*. *PLoS Biol* **14**, e1002455. (doi:10.1371/journal.pbio.1002455)
- 429 14. Kandel E. 2016 *Reductionism in Art and Brain Science: Bridging the Two Cultures*.  
430 Columbia University Press.

- 431 15. Ohyama T *et al.* 2015 A multilevel multimodal circuit enhances action selection in  
432 *Drosophila*. *Nature* **520**, 633–639. (doi:10.1038/nature14297)
- 433 16. Maselli V, Al-Soudy A-S, Buglione M, Aria M, Polese G, Di Cosmo A. 2020 Sensorial  
434 Hierarchy in *Octopus vulgaris*'s Food Choice: Chemical vs. Visual. *Animals* **10**, 457.  
435 (doi:10.3390/ani10030457)
- 436 17. Rohe T, Noppeney U. 2015 Cortical Hierarchies Perform Bayesian Causal Inference in  
437 Multisensory Perception. *PLoS Biol* **13**, e1002073. (doi:10.1371/journal.pbio.1002073)
- 438 18. Banquet JP, Gaussier Ph, Quoy M, Revel A, Burnod Y. 2005 A Hierarchy of  
439 Associations in Hippocampo-Cortical Systems: Cognitive Maps and Navigation  
440 Strategies. *Neural Computation* **17**, 1339–1384. (doi:10.1162/0899766053630369)
- 441 19. Esch HE, Zhang S, Srinivasan MV, Tautz J. 2001 Honeybee dances communicate  
442 distances measured by optic flow. *Nature* **411**, 581–583. (doi:10.1038/35079072)
- 443 20. Anderson DJ. 2016 Circuit modules linking internal states and social behaviour in flies  
444 and mice. *Nat. Rev. Neurosci.* **17**, 692–704. (doi:10.1038/nrn.2016.125)
- 445 21. Baggett V, Mishra A, Kehrer AL, Robinson AO, Shaw P, Zars T. 2018 Place learning  
446 overrides innate behaviors in *Drosophila*. *Learn. Mem.* **25**, 122–128.  
447 (doi:10.1101/lm.046136.117)
- 448 22. Ostrowski D, Kahsai L, Kramer EF, Knutson P, Zars T. 2015 Place memory retention in  
449 *Drosophila*. *Neurobiology of Learning and Memory* **123**, 217–224.  
450 (doi:10.1016/j.nlm.2015.06.015)
- 451 23. Navawongse R, Choudhury D, Raczkowska M, Stewart JC, Lim T, Rahman M, Toh  
452 AGG, Wang Z, Claridge-Chang A. 2016 *Drosophila* learn efficient paths to a food

- 453 source. *Neurobiology of Learning and Memory* **131**, 176–181.  
454 (doi:10.1016/j.nlm.2016.03.019)
- 455 24. Deisseroth K. 2015 Optogenetics: 10 years of microbial opsins in neuroscience. *Nat*  
456 *Neurosci* **18**, 1213–1225. (doi:10.1038/nn.4091)
- 457 25. Riemensperger T, Kittel RJ, Fiala A. 2016 Optogenetics in Drosophila Neuroscience. In  
458 *Optogenetics* (ed A Kianianmomeni), pp. 167–175. New York, NY: Springer New York.  
459 (doi:10.1007/978-1-4939-3512-3\_11)
- 460 26. Branson K, Robie AA, Bender J, Perona P, Dickinson MH. 2009 High-throughput  
461 ethomics in large groups of Drosophila. *Nat Methods* **6**, 451–457.  
462 (doi:10.1038/nmeth.1328)
- 463 27. Bates D *et al.* 2019 *lme4: Linear Mixed-Effects Models using ‘Eigen’ and S4*. See  
464 <https://CRAN.R-project.org/package=lme4>.
- 465 28. Raftery AE. 1995 Bayesian Model Selection in Social Research. *Sociological*  
466 *Methodology* **25**, 111. (doi:10.2307/271063)
- 467 29. Marcon E, Puech F. 2017 A typology of distance-based measures of spatial  
468 concentration. *Regional Science and Urban Economics* **62**, 56–67.  
469 (doi:10.1016/j.regsciurbeco.2016.10.004)
- 470 30. Marcon E, Traissac S, Puech F, Lang G. 2015 Tools to Characterize Point Patterns:  
471 **dbmss** for *R*. *J. Stat. Soft.* **67**. (doi:10.18637/jss.v067.c03)
- 472 31. Marcon E, Puech F, Traissac S. 2012 Characterizing the Relative Spatial Structure of  
473 Point Patterns. *International Journal of Ecology* **2012**, 1–11.  
474 (doi:10.1155/2012/619281)

- 475 32. Wickham H. 2009 *ggplot2*. New York, NY: Springer New York. (doi:10.1007/978-0-387-  
476 98141-3)
- 477 33. In press. *Alboukadel Kassambara (2018). ggpubr: 'ggplot2' Based Publication Ready*  
478 *Plots. R package version 0.2. <https://CRAN.R-project.org/package=ggpubr>.*
- 479 34. Meda N, Frighetto G, Megighian A, Zordan MA. 2020 Searching for relief: *Drosophila*  
480 *melanogaster* navigation in a virtual bitter maze. *Behavioural Brain Research* , 112616.  
481 (doi:10.1016/j.bbr.2020.112616)
- 482 35. Heisenberg M. 1995 Pattern recognition in insects. *Current Opinion in Neurobiology* **5**,  
483 475–481. (doi:10.1016/0959-4388(95)80008-5)
- 484 36. Wolf R, Heisenberg M. 1991 Basic organization of operant behavior as revealed in  
485 *Drosophila* flight orientation. *J. Comp. Physiol. A* **169**, 699–705.
- 486 37. Wustmann G, Rein K, Wolf R, Heisenberg M. 1996 A new paradigm for operant  
487 conditioning of *Drosophila melanogaster*. *J Comp Physiol A* **179**.  
488 (doi:10.1007/BF00194996)
- 489 38. Brockmann A, Basu P, Shakeel M, Murata S, Murashima N, Boyapati RK, Prabhu NG,  
490 Herman JJ, Tanimura T. 2018 Sugar Intake Elicits Intelligent Searching Behavior in  
491 Flies and Honey Bees. *Front. Behav. Neurosci.* **12**, 280.  
492 (doi:10.3389/fnbeh.2018.00280)

493

**A**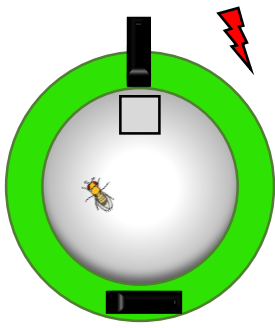

Optogenetic stimulation depends on the fly's position in the arena. The safe zone is marked by a black vertical stripe

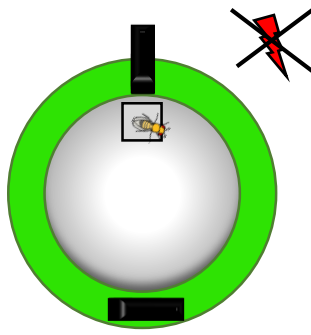

When the fly stays in the safe zone, stimulation ceases. The next trial the safe zone – vertical stripe match will be moved on the opposite side of the arena

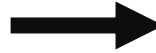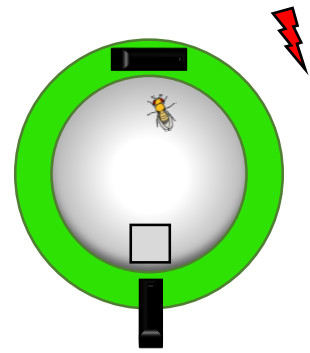

At the beginning of a new trial, does the fly perform local search to stop the bitter stimulation or is its searching behaviour immediately directed towards the vertical stripe?

**B**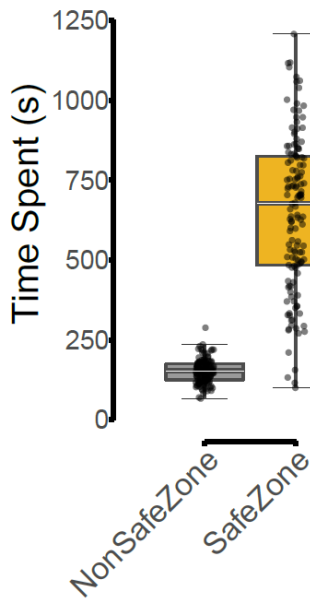**C**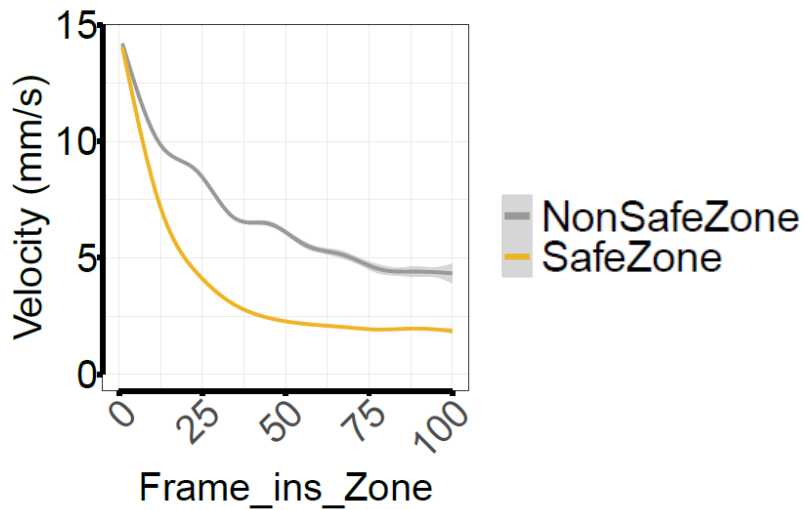**D**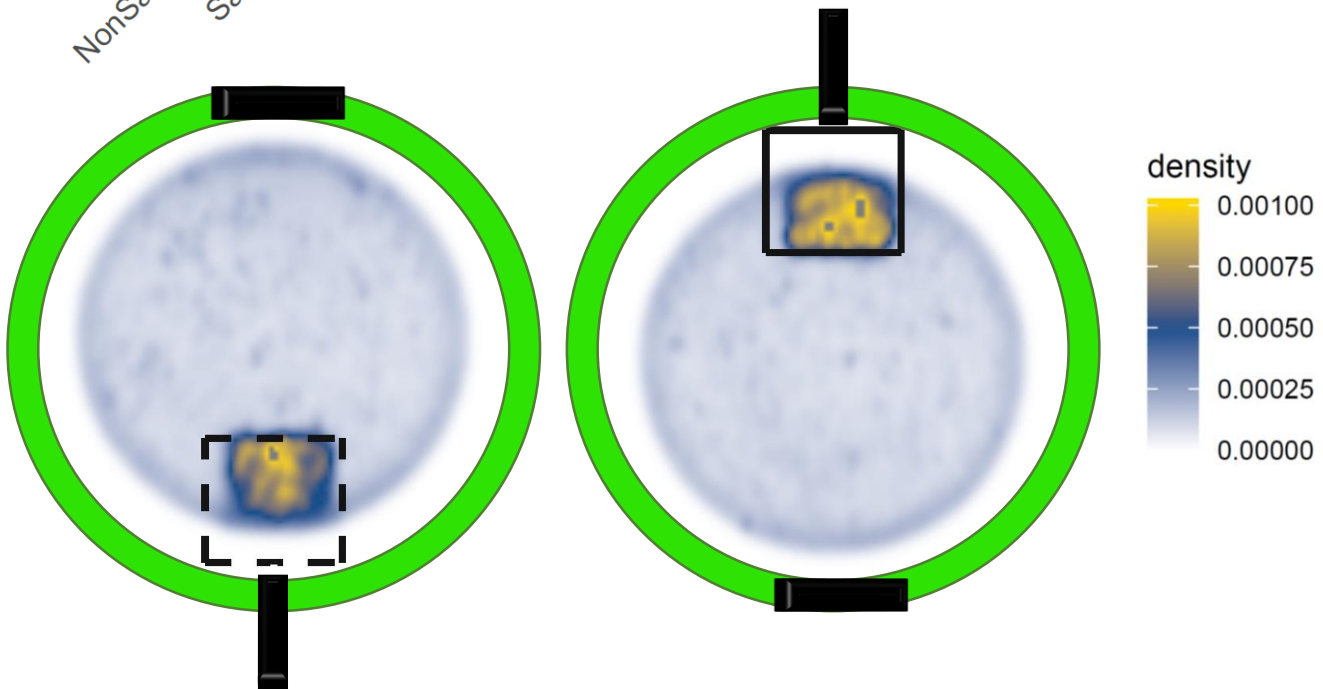

● PreviousSafeZone  
◆ SafeZone

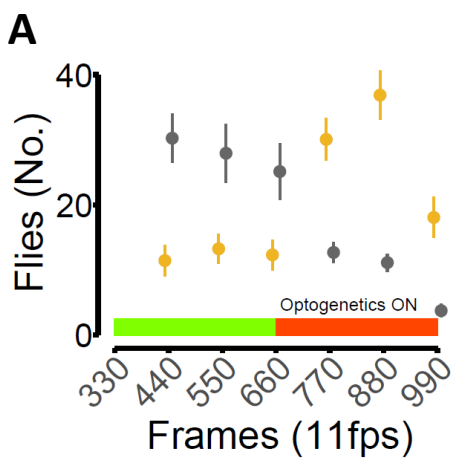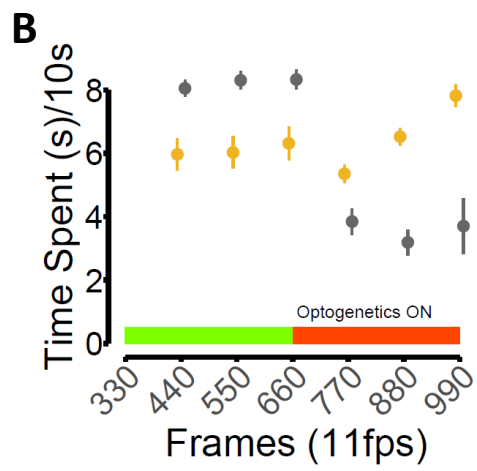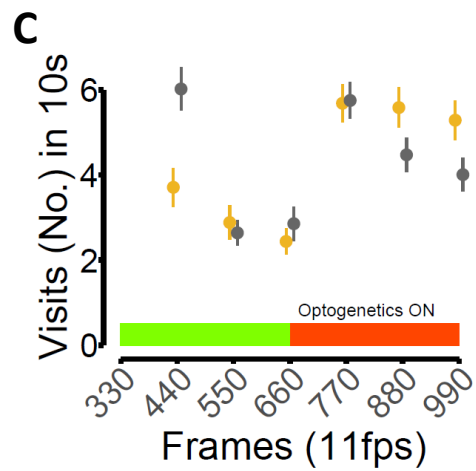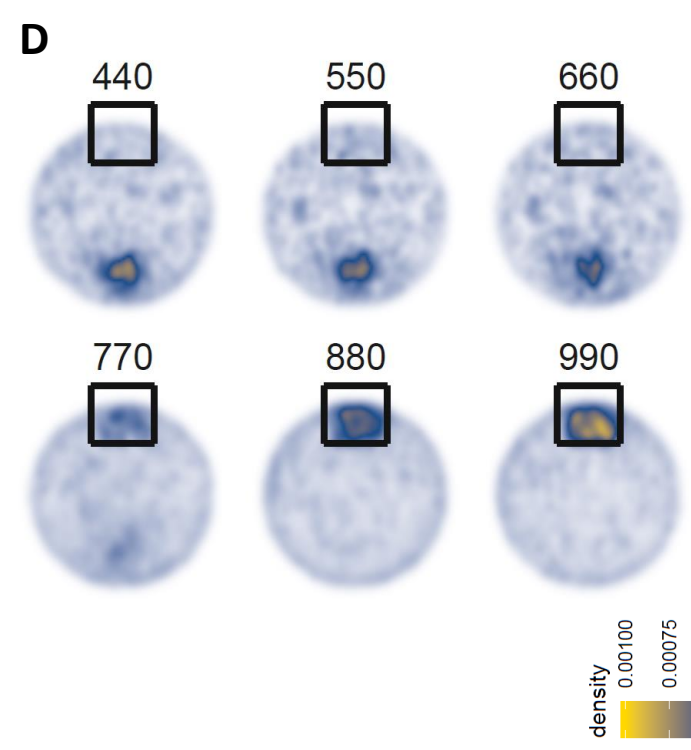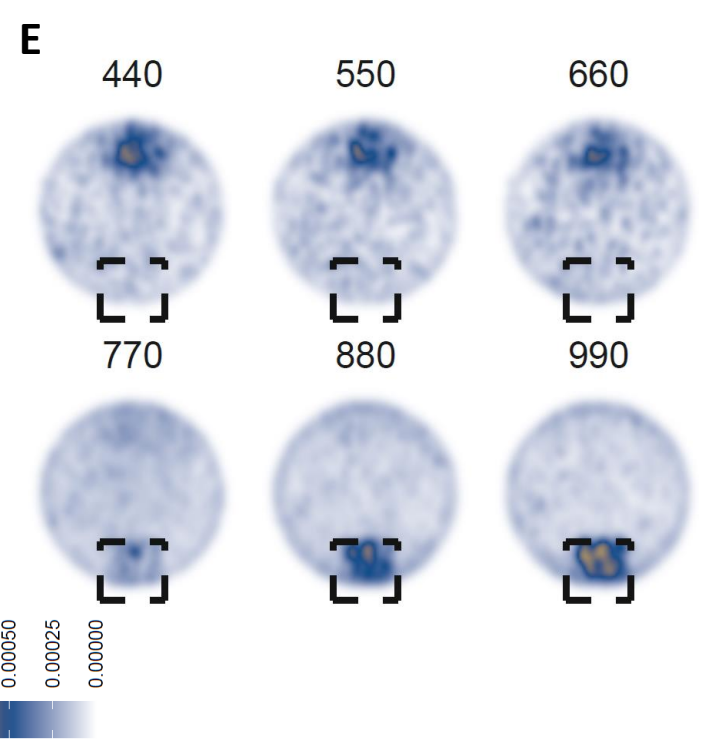

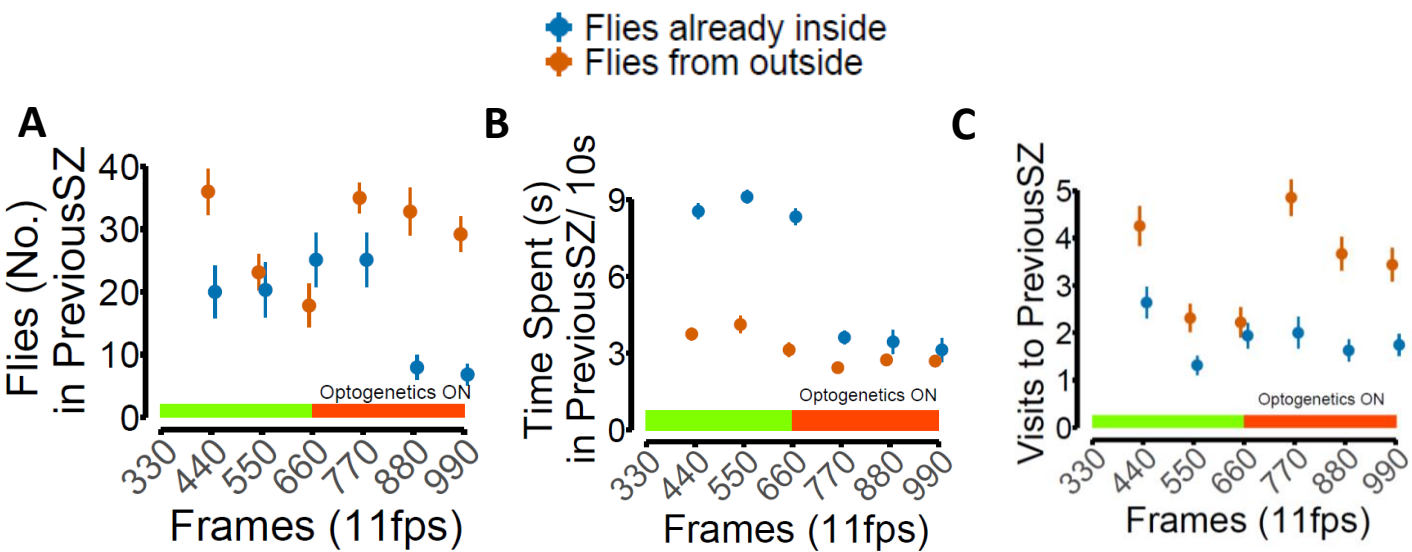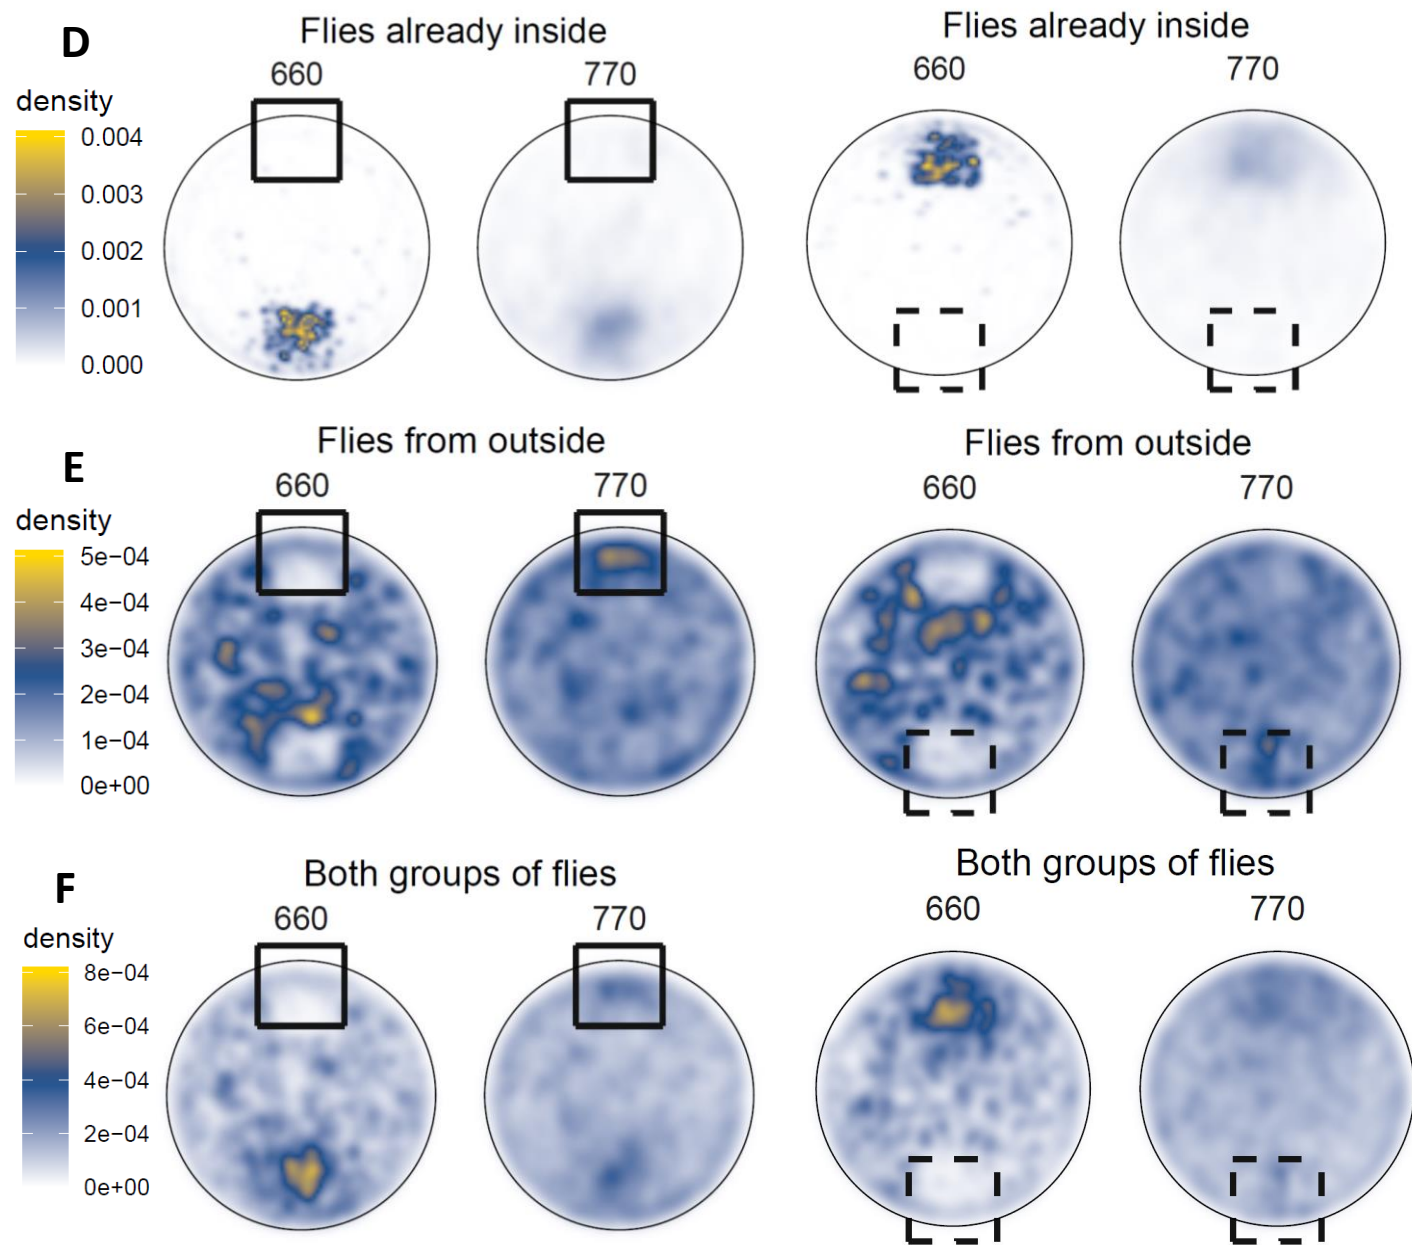

# Flies from outside of both zones

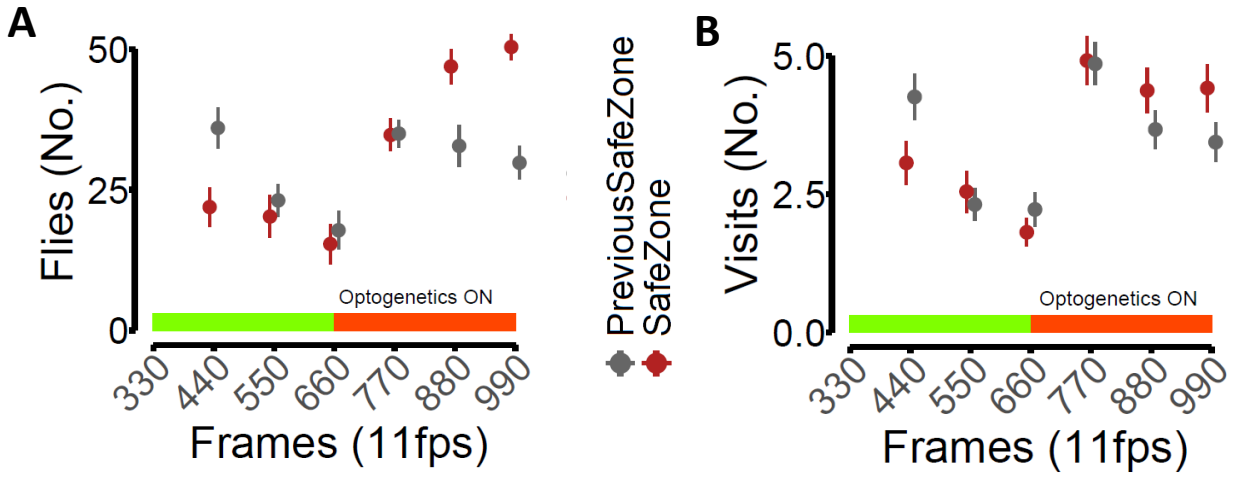



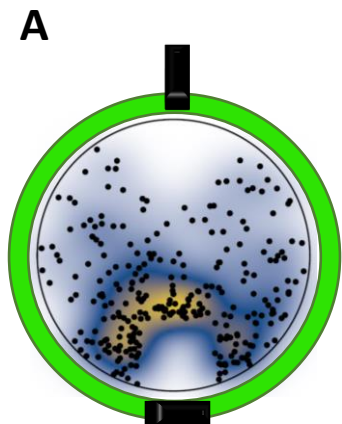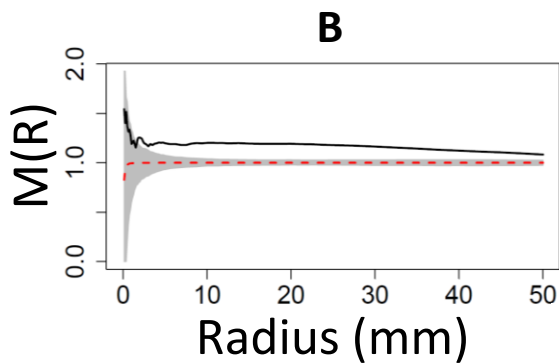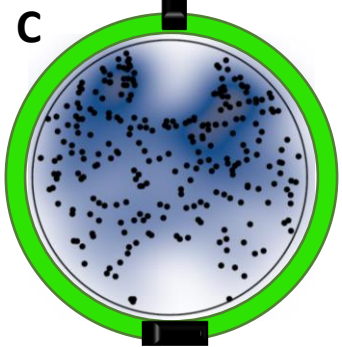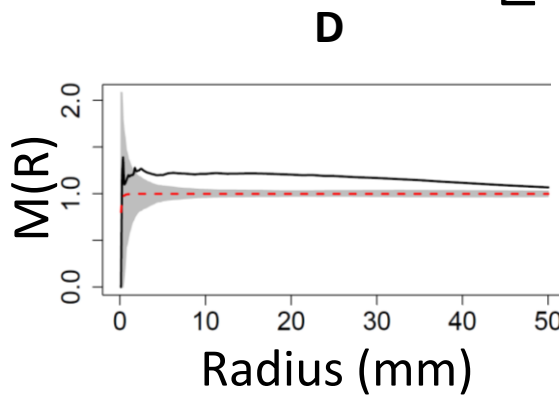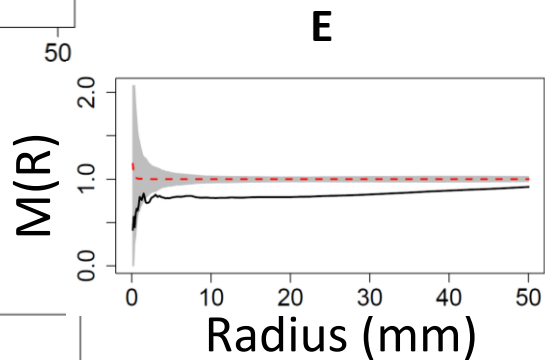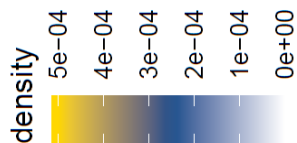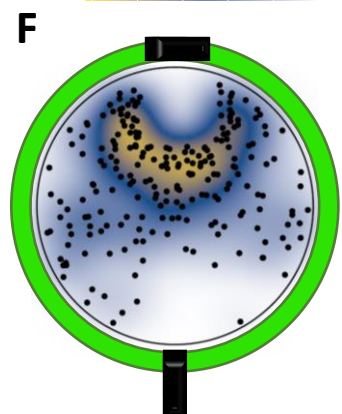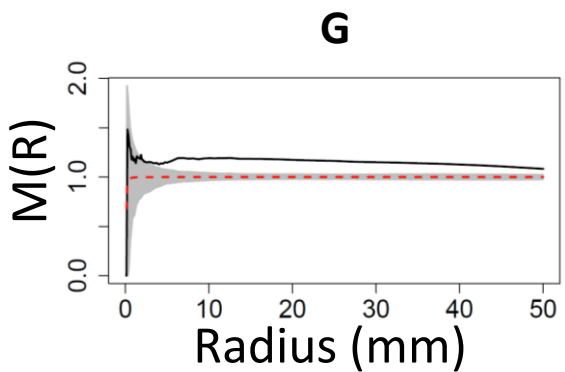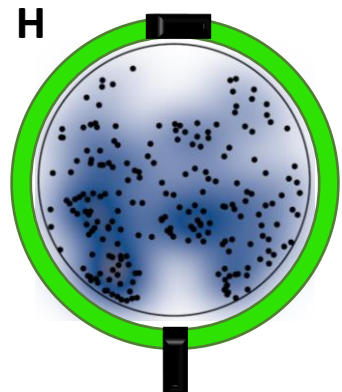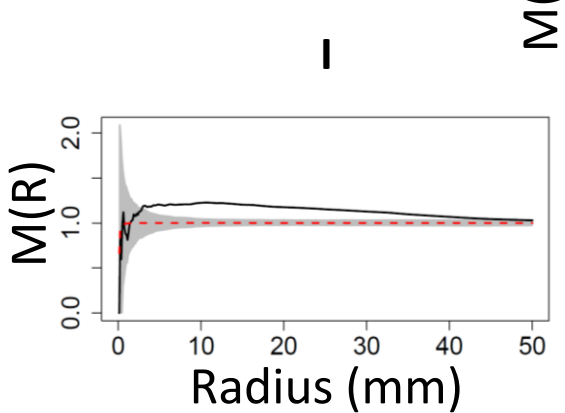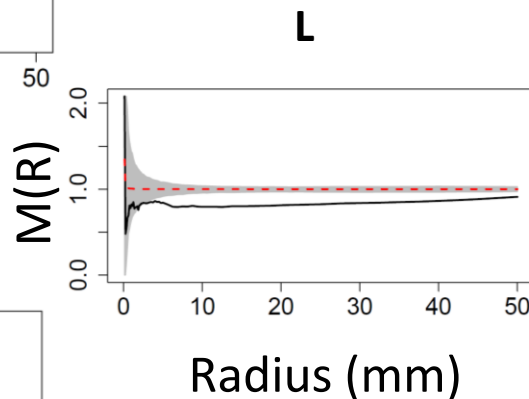

Source: https://www.biorxiv.org/content/10.1101/2020.06.01.127753v1.full.pdf
